# Supplementary material for: Changes in the Intranetwork and Internetwork Connectivity of the Default Mode Network and Olfactory Network in Patients with COVID-19 and Olfactory Dysfunction
Source: MDPI journal article supplement (doi:10.3390/brainsci12040511), 2022-04-18
Supplement: s1 [file s1]

## Supplementary materials

Table S1. Anatomic location of the 31 regions of interest used to characterize the olfactory network.

| AAL label | Anatomic location                            | Coordinate |    |     | Peak t value |
|-----------|----------------------------------------------|------------|----|-----|--------------|
|           |                                              | x          | y  | z   |              |
| 3         | Left superior frontal gyrus, dorsolateral    | -21        | 42 | 33  | 9.3          |
| 4         | Right superior frontal gyrus, dorsolateral   | 18         | 60 | 12  | 6.5          |
| 5         | Left superior frontal gyrus, orbital         | -21        | 21 | -12 | 10.69        |
| 6         | Right superior frontal gyrus, orbital        | 18         | 15 | -18 | 10.44        |
| 7         | Left middle frontal gyrus                    | -21        | 42 | 30  | 9.02         |
| 8         | Right middle frontal gyrus                   | 21         | 45 | 27  | 5.14         |
| 9         | Left middle frontal gyrus, orbital part      | -21        | 33 | -18 | 8.59         |
| 10        | Right middle frontal gyrus, orbital part     | 24         | 30 | -21 | 8.76         |
| 13        | Left inferior frontal gyrus, triangular part | -36        | 27 | 30  | 6.78         |
| 15        | Left inferior frontal gyrus, orbital part    | -30        | 27 | -21 | 10           |
| 16        | Right inferior frontal gyrus, orbital part   | 18         | 18 | -18 | 9.3          |
| 21        | Left olfactory cortex                        | -3         | 15 | -3  | 19.79        |
| 23        | Left superior frontal gyrus, medial          | -15        | 60 | 12  | 8.68         |
| 24        | Right superior frontal gyrus, medial         | 15         | 48 | 0   | 8.43         |
| 25        | Left superior frontal gyrus, medial orbital  | -6         | 42 | -12 | 9            |
| 26        | Right superior frontal gyrus, medial orbital | 15         | 45 | 0   | 9.79         |
| 29        | Left insula                                  | -24        | 12 | -18 | 8.61         |
| 30        | Right insula                                 | 24         | 15 | -18 | 9.3          |
| 31        | Left anterior cingulate cortex               | -6         | 39 | 9   | 8.9          |
| 32        | Right anterior cingulate cortex              | 9          | 36 | 0   | 9.79         |
| 38        | Right hippocampus                            | 21         | 0  | -21 | 7.31         |
| 41        | Left amygdala                                | -18        | 3  | -15 | 8.93         |
| 42        | Right amygdala                               | 18         | 6  | -15 | 10.75        |

|    |                                              |     |    |     |       |
|----|----------------------------------------------|-----|----|-----|-------|
| 71 | Left caudate nucleus                         | -9  | 15 | 0   | 52.29 |
| 72 | Right caudate nucleus                        | 9   | 18 | -3  | 16.55 |
| 73 | Left putamen                                 | -15 | 15 | 0   | 25.07 |
| 74 | Right putamen                                | 15  | 15 | -6  | 13.61 |
| 75 | Left lenticular nucleus, pallidum            | -12 | 9  | 0   | 22.1  |
| 76 | Right lenticular nucleus, pallidum           | 12  | 6  | -3  | 13.5  |
| 83 | Left temporal pole: superior temporal gyrus  | -21 | 6  | -21 | 9.42  |
| 84 | Right temporal pole: superior temporal gyrus | 21  | 9  | -18 | 10.67 |

Table S2. Anatomic location of the 37 regions of interest used to characterize the default mode network

| AAL label | Anatomic location                              | Coordinate |     |     | Peak t value |
|-----------|------------------------------------------------|------------|-----|-----|--------------|
|           |                                                | x          | y   | z   |              |
| 3         | Left superior frontal gyrus, dorsolateral      | -24        | 36  | 36  | 14.5         |
| 4         | Right superior frontal gyrus, dorsolateral     | 24         | 36  | 39  | 13.04        |
| 7         | Left middle frontal gyrus                      | -24        | 36  | 30  | 14.72        |
| 8         | Right middle frontal gyrus                     | 24         | 36  | 36  | 13.65        |
| 23        | Left superior frontal gyrus, medial            | 0          | 57  | 3   | 15.14        |
| 24        | Right superior frontal gyrus, medial           | 3          | 57  | 3   | 15.17        |
| 25        | Left superior frontal gyrus, medial orbital    | 0          | 51  | -12 | 16.78        |
| 26        | Right superior frontal gyrus, medial orbital   | 3          | 51  | -12 | 17.15        |
| 31        | Left anterior cingulate cortex                 | -9         | 48  | -3  | 17.79        |
| 33        | Left middle cingulate cortex                   | -12        | -51 | 33  | 13.22        |
| 34        | Right middle cingulate cortex                  | 0          | -30 | 33  | 12.76        |
| 35        | Left posterior cingulate cortex                | -3         | -48 | 21  | 28.04        |
| 36        | Right posterior cingulate cortex               | 3          | -42 | 18  | 21.89        |
| 37        | Left hippocampus                               | -24        | -18 | -18 | 7.93         |
| 38        | Right hippocampus                              | 27         | -21 | -15 | 6.66         |
| 39        | Left parahippocampus                           | -27        | -24 | -24 | 13.77        |
| 40        | Right parahippocampus                          | 27         | -21 | -24 | 12.52        |
| 43        | Left calcarine fissure and surrounding cortex  | -3         | -57 | 12  | 31.48        |
| 44        | Right calcarine fissure and surrounding cortex | 3          | -57 | 15  | 38.8         |
| 45        | Left cuneus                                    | -9         | -60 | 21  | 23.54        |
| 46        | Right cuneus                                   | 3          | -60 | 21  | 27.11        |
| 47        | Left lingual gyrus                             | -6         | -51 | 3   | 18.56        |
| 48        | Right lingual gyrus                            | 6          | -54 | 9   | 25.96        |
| 49        | Left superior occipital gyrus                  | -27        | -75 | 42  | 6.32         |
| 51        | Left middle occipital gyrus                    | -45        | -72 | 27  | 15.43        |

|    |                                            |     |     |     |       |
|----|--------------------------------------------|-----|-----|-----|-------|
| 52 | Right middle occipital gyrus               | 51  | -66 | 27  | 9.12  |
| 55 | Left fusiform gyrus                        | -27 | -27 | -24 | 14.92 |
| 56 | Right fusiform gyrus                       | 27  | -27 | -21 | 11.04 |
| 61 | Left inferior parietal gyrus               | -39 | -75 | 42  | 11.18 |
| 65 | Left angular gyrus                         | -45 | -69 | 27  | 15.71 |
| 66 | Right angular gyrus                        | 51  | -66 | 30  | 9.8   |
| 67 | Left precuneus                             | -6  | -57 | 18  | 55.75 |
| 68 | Right precuneus                            | 3   | -57 | 18  | 38.74 |
| 82 | Right superior temporal gyrus              | 48  | -57 | 24  | 10.26 |
| 85 | Left middle temporal gyrus                 | -51 | -66 | 21  | 16.08 |
| 86 | Right middle temporal gyrus                | 60  | -3  | -27 | 16.35 |
| 88 | Right temporal pole: middle temporal gyrus | 57  | 9   | -33 | 9.29  |
